# Supplementary material for: Polyester-Based Dendrimer Nanoparticles Combined with Etoposide Have an Improved Cytotoxic and Pro-Oxidant Effect on Human Neuroblastoma Cells
Source: MDPI journal article supplement (doi:10.3390/antiox9010050), 2020-01-06
Supplement: s1 [file s1]

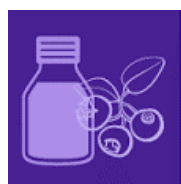

*antioxidants*

## Supplementary Material

### **Polyester-based dendrimer nanoparticles combined with Etoposide have an improved cytotoxic and pro-oxidant effect on human neuroblastoma cells**

Silvana Alfei,<sup>1,\*§</sup> Barbara Marengo,<sup>2§</sup> and Cinzia Domenicotti<sup>2,\*</sup>

<sup>1</sup>Department of Pharmacy, University of Genoa, Viale Cembrano, 4 I-16148 Genoa, Italy

<sup>2</sup>Department of Experimental Medicine - DIMES, Via Alberti L.B. 2 I- 16132 Genoa, Italy

§ Authors have equally contributed

\*Corresponding Authors: [cinzia.domenicotti@unige.it](mailto:cinzia.domenicotti@unige.it), [alfei@difar.unige.it](mailto:alfei@difar.unige.it)

## Table of Contents

Figure S1: Structure of dendron intermediates synthesized to prepare **4**: D4BnA, D4BnOH, D5BnA and D5ACOOH

Section S1: Characterization of dendrimer **4**

*Table S1: Molecular Weight (MW) and significant physicochemical data of dendrimer **4***

*Copies of FTIR and NMR spectra of dendrimer **4***

*Figure S2: FTIR of dendrimer **4** (a), <sup>1</sup>H NMR of dendrimer **4** (b), <sup>13</sup>C NMR and DEPT 135 of dendrimer **4** (c)*

Section S2: FTIR and NMR spectra of etoposide (ETO)

*Figure S3: FTIR of ETO (a), <sup>1</sup>H NMR of ETO (b), <sup>13</sup>C NMR of ETO (c)*

Section S3: FTIR and NMR spectra of CPX **5**

*Figure S4: FTIR of CPX **5** (a), <sup>1</sup>H NMR of CPX **5** (b)*

Section S4: Comparison between FTIR and <sup>1</sup>H NMR spectra of ETO, dendrimer **4** and CPX **5**

*Figure S5: FTIR spectra of ETO (a), dendrimer **4** (b) and CPX **5** (c) with in evidence peaks of **4** (1), peaks of ETO (2) and of **5** (3)*

*Figure S6: <sup>1</sup>H-NMR spectra of ETO (a), dendrimer **4** (b) and CPX **5** (c)*

Section S5: Principal Components Analysis Results

*Figure S7: Bi-plot and score plot on Components PC1 and PC2*

Section S6: UV Spectrophotometric Analysis results

*Table S2: Data of the calibration curve:  $A_{average}$  and ETO standards  $\mu\text{g/mL}$  concentrations. ETO predicted concentrations, residuals and ETO  $\mu\text{M}$  concentrations*

*Figure S8: UV spectra of ETO dissolved in ACN/TDW 50:50 at the different concentrations used to build up the standard ETO calibration curve (a), standard ETO calibration curve (b), real ETO concentrations versus predicted ones (c), Absorbance (A) at  $\lambda = 286 \text{ nm}$  versus standards ETO concentrations ( $\mu\text{M}$ )(d).*

Section S7: DLS Results

*Figure S9: Dynamic Light Scattering Analysis of CPX **5***

References

**D4BnA**

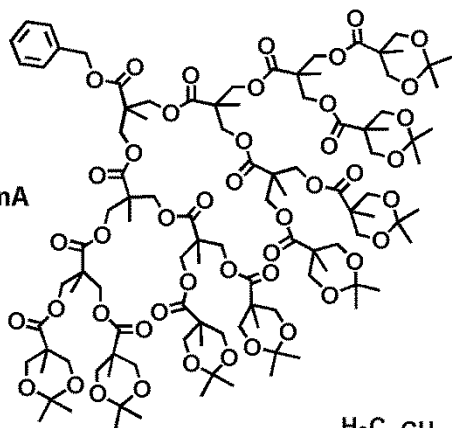

**D4BnOH**

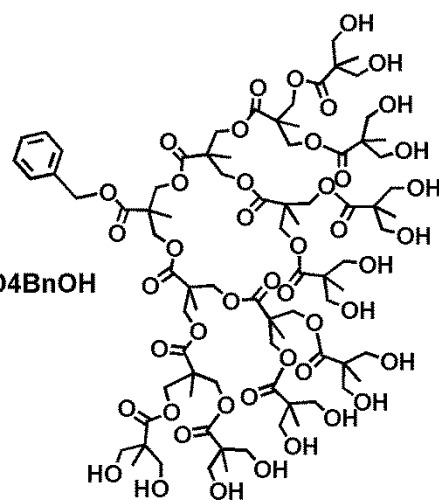

**D5BnA**

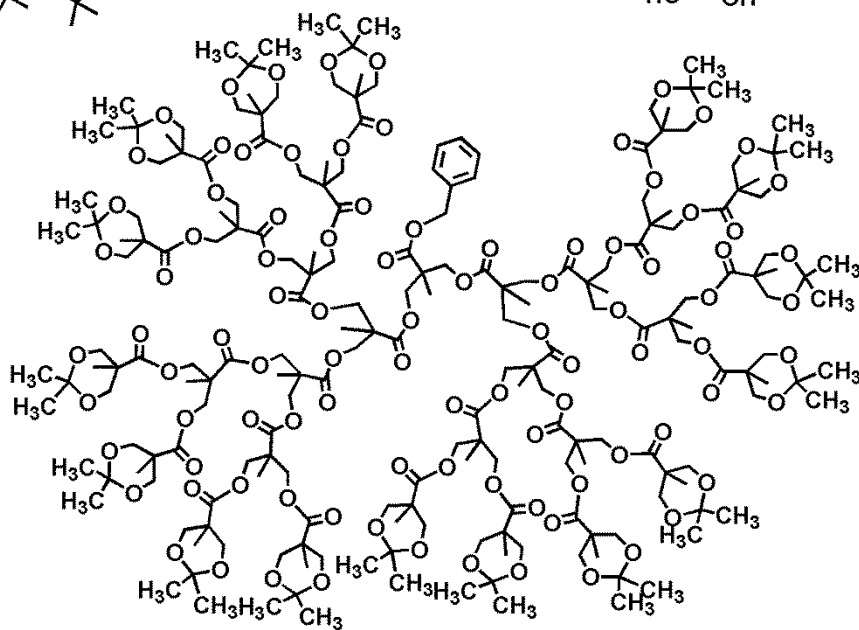

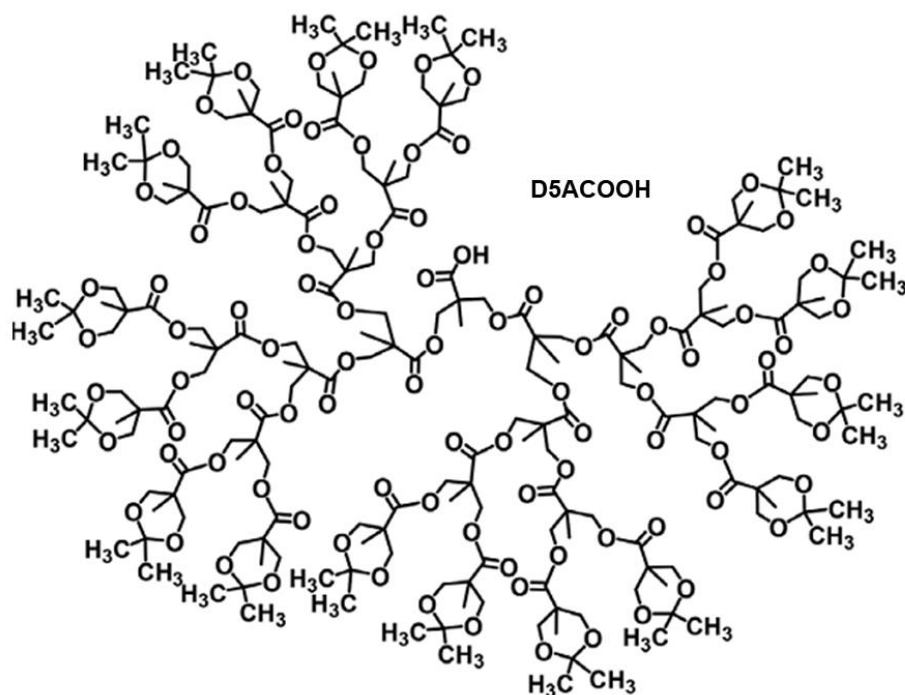

**Figure S1.** Structure of dendron intermediates achieved to synthesize **4**: D4BnA, D4BnOH, D5BnA and D5ACOOH

## Section S1

### Characterization data of dendrimer **4**

#### *FT-IR, NMR spectra data and Elemental analysis results of compound **4** [1]*

**Dendrimer 4.** FTIR (KBr,  $\text{cm}^{-1}$ ): 3433 (OH), 2933, 1733 ( $\text{C}=\text{O}$ ).  $^1\text{H}$  NMR (300 MHz,  $\text{DMSO}-d_6$ ),  $\delta$  (ppm): 1.01, 1.16, 1.18, 1.23, 1.34 (five s signals, 186H,  $\text{CH}_3$  of generations), 1.70 (m, 2H,  $\text{CH}_2$  propandiol), 3.52 (dd, 128H,  $\text{CH}_2\text{OH}$ ), 3.56 (partially overlapped signal, 2H,  $\text{CH}_2\text{O}$  propandiol), 3.98 (partially overlapped signal, 2H,  $\text{CH}_2\text{O}$  propandiol), 4.08-4.18 (m, 120H,  $\text{CH}_2\text{O}$  of four generations), 4.37 (br s, 64H, OH).  $^{13}\text{C}$  NMR (75.5 MHz,  $\text{DMSO}-d_6$ )  $\delta$  (ppm): 173.94, 171.73 ( $\text{C}=\text{O}$ ), 64.27, 63.55 ( $\text{CH}_2\text{O}$ ), 50.13 (quaternary C of fifth generation), 46.12 (other generation detectable quaternary C), 17.05, 16.61 ( $\text{CH}_3$  of generations). Found: C, 51.71; H, 7.01.  $\text{C}_{313}\text{H}_{504}\text{O}_{188}$  requires C, 51.67; H, 6.98%.

**Table S1.** Elemental Analysis and other physicochemical data of dendrimer **4** [1].

| Compound | Formula                                                   | MW                   | Required (%)      | Found (%)         | Error (%)        | Physical state                    |
|----------|-----------------------------------------------------------|----------------------|-------------------|-------------------|------------------|-----------------------------------|
| <b>4</b> | $\text{C}_{313}\text{H}_{504}\text{O}_{188}$ <sup>1</sup> | 7275.24 <sup>1</sup> | C 51.67<br>H 6.98 | C 51.71<br>H 7.01 | C 0.04<br>H 0.03 | Fluffy white<br>hygroscopic solid |

<sup>1</sup> Formula and MW of dendrimer **4** were estimated by  $^1\text{H}$  NMR spectra and were confirmed by Elemental Analysis.

Copies of FT-IR and NMR spectra of dendrimer 4 [1]

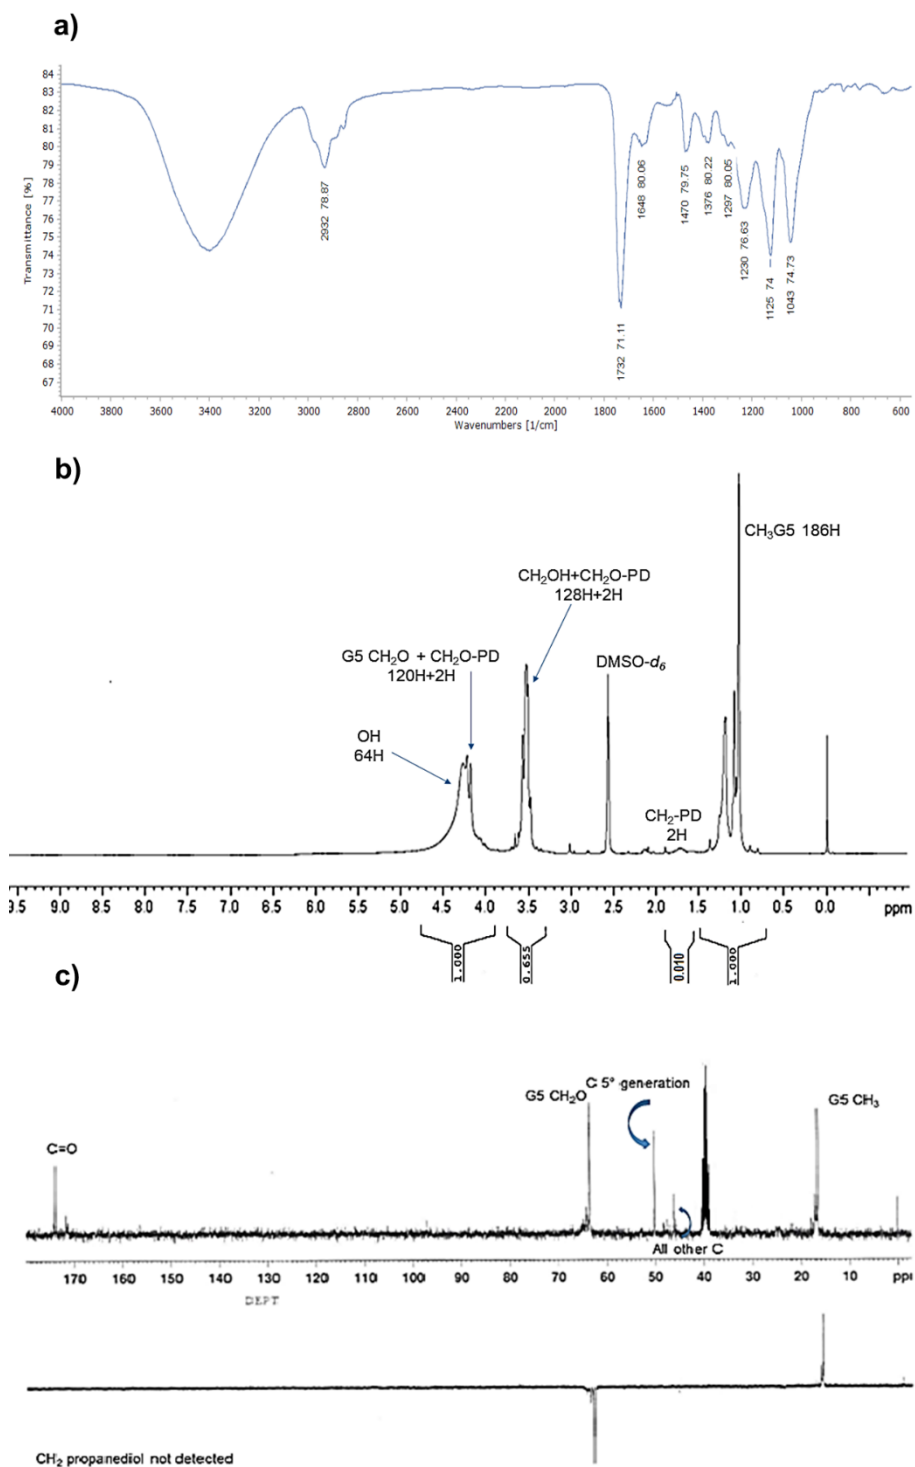

**Figure S2.** FTIR spectrum (KBr) (a), <sup>1</sup>H NMR spectrum (DMSO-*d*<sub>6</sub>, 300 MHz) (b) and <sup>13</sup>C NMR and DEPT 135 spectra (DMSO-*d*<sub>6</sub>, 75.5 MHz) (c) of dendrimer 4.

## Section S2

### FTIR and NMR spectra of etoposide (ETO)

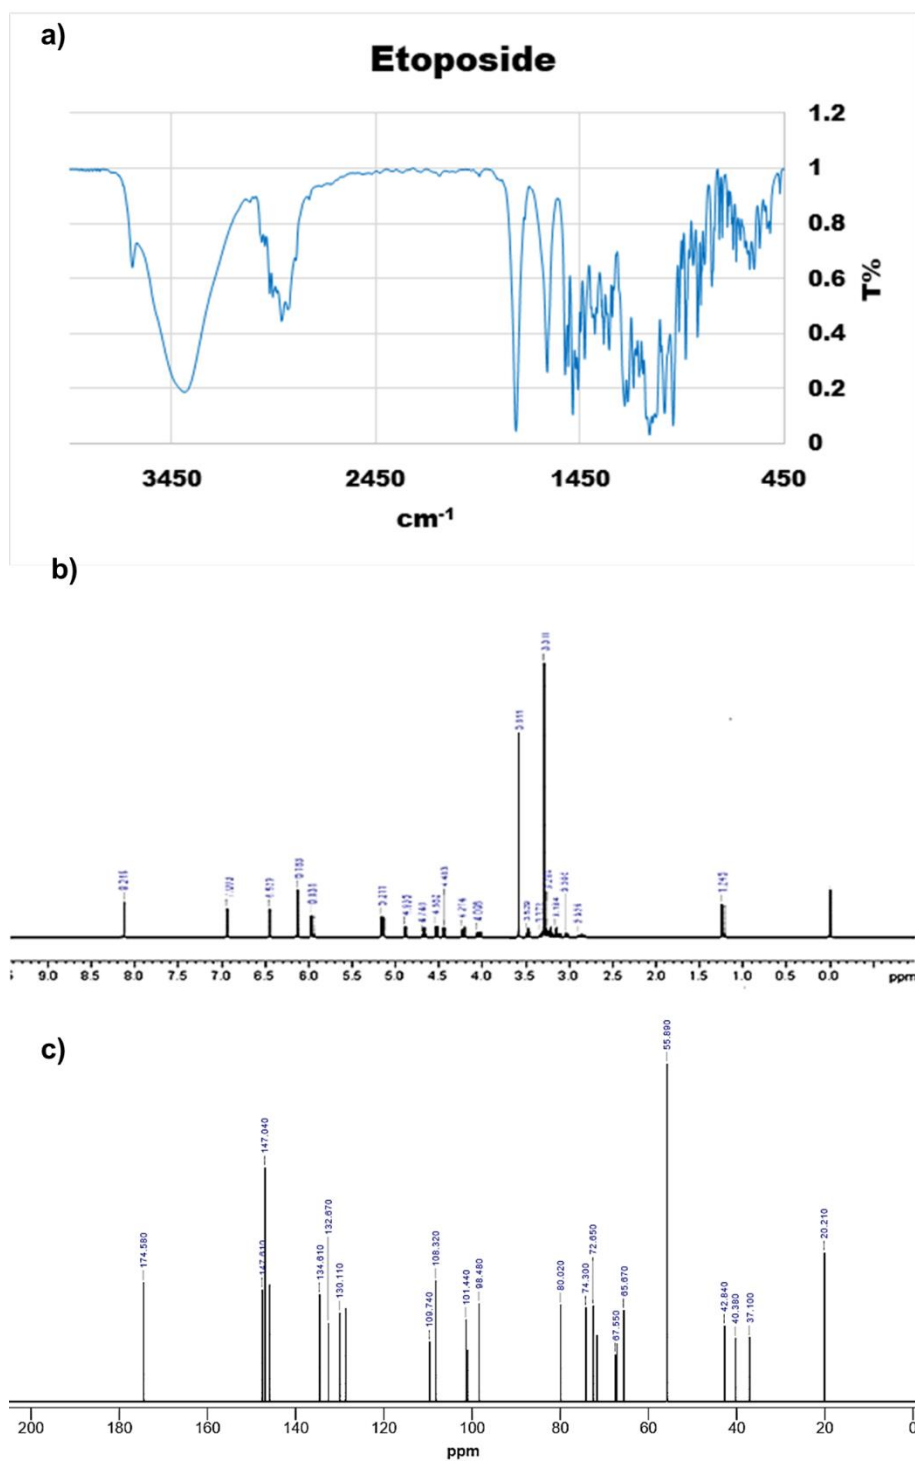

**Figure S3.** FTIR spectrum (KBr) (a),  $^1\text{H}$  NMR spectrum (DMSO- $d_6$ , 400 MHz) (b) [2] and  $^{13}\text{C}$  NMR spectrum (DMSO- $d_6$ , 100 MHz) (c) of ETO [2].

FTIR and NMR spectra of CPX 5

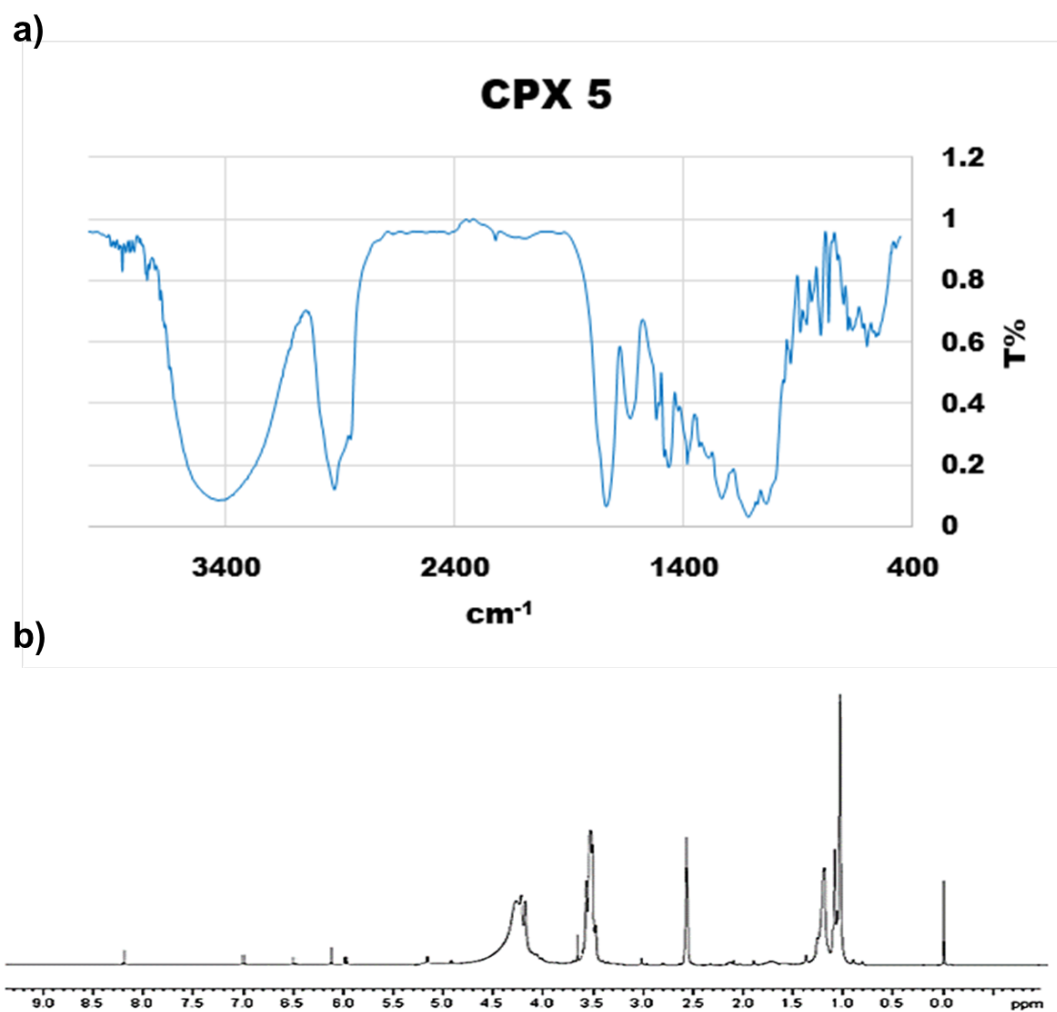

**Figure S4.** FTIR spectrum (KBr) (a) and  $^1\text{H}$  NMR spectrum (DMSO- $d_6$ , 300 MHz) (b) of CPX 5.

## Comparison between FTIR and NMR spectra of ETO, 4 and CPX 5

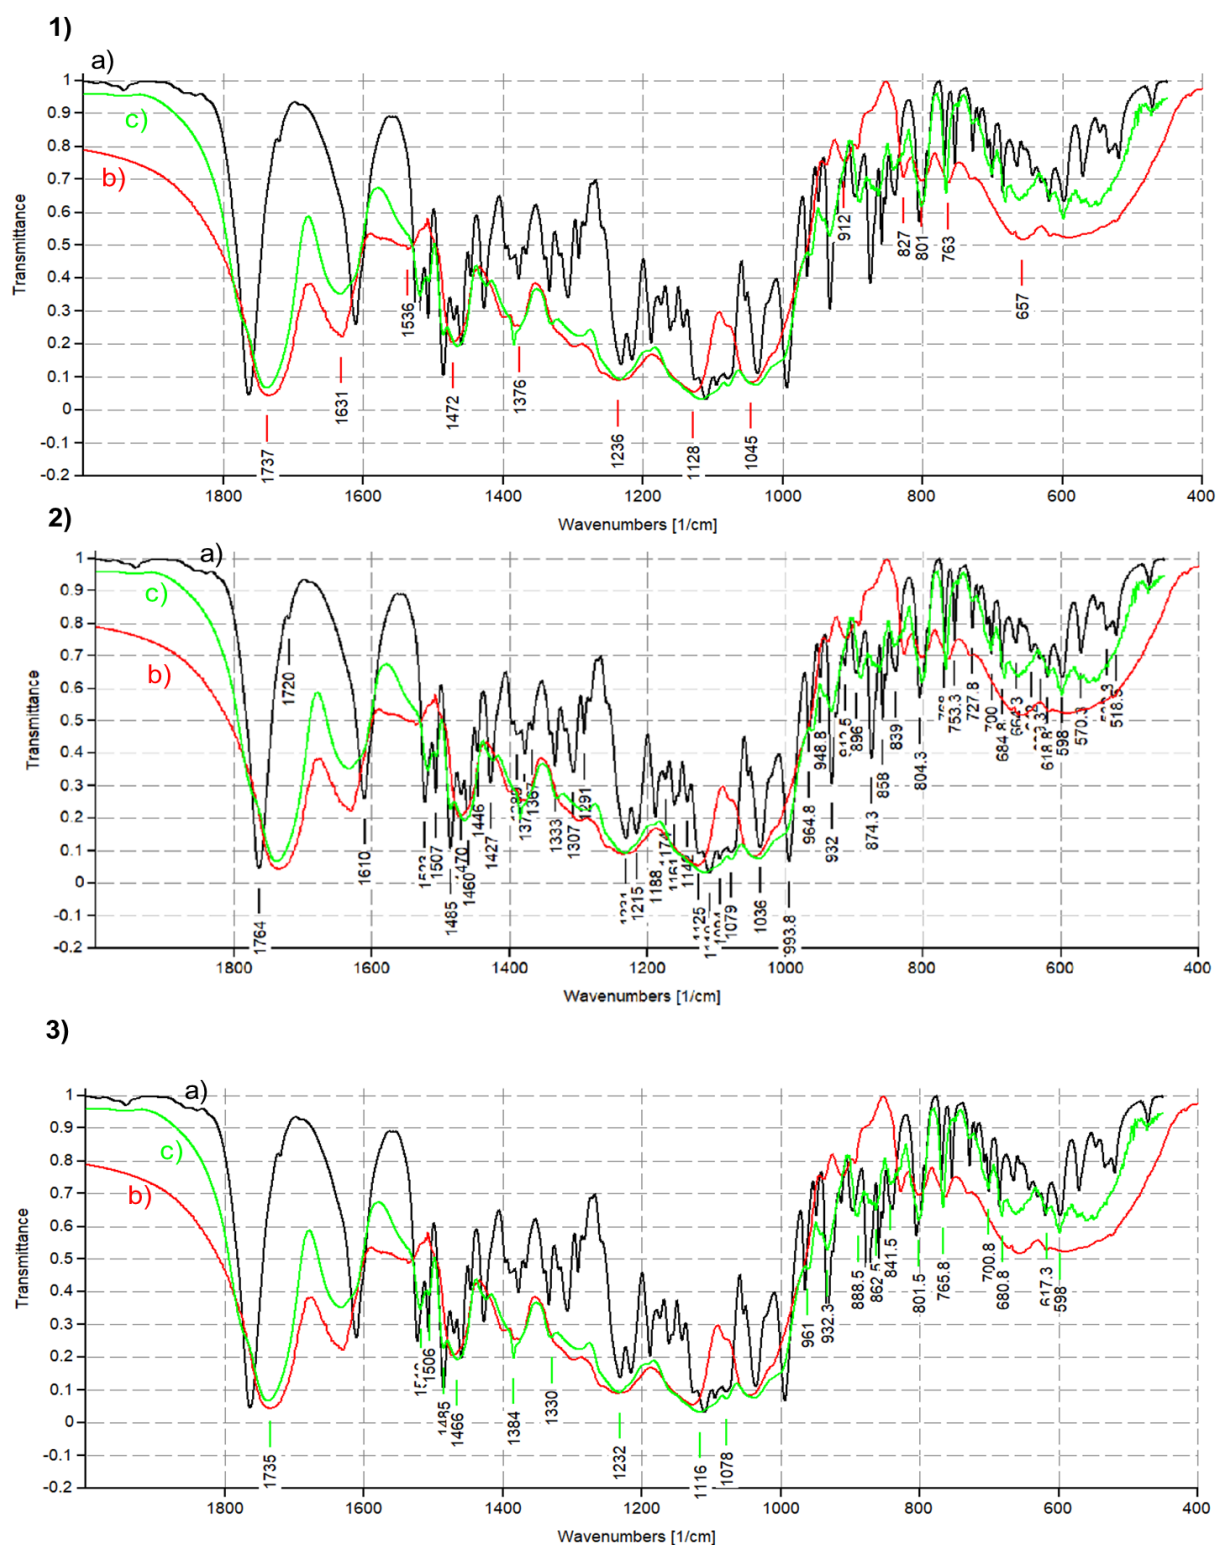

**Figure S5.** FTIR spectra of ETO (a), dendrimer 4 (b) and CPX 5 (c) with in evidence peaks of 4 (1), peaks of ETO (2) and peaks of 5 (3).



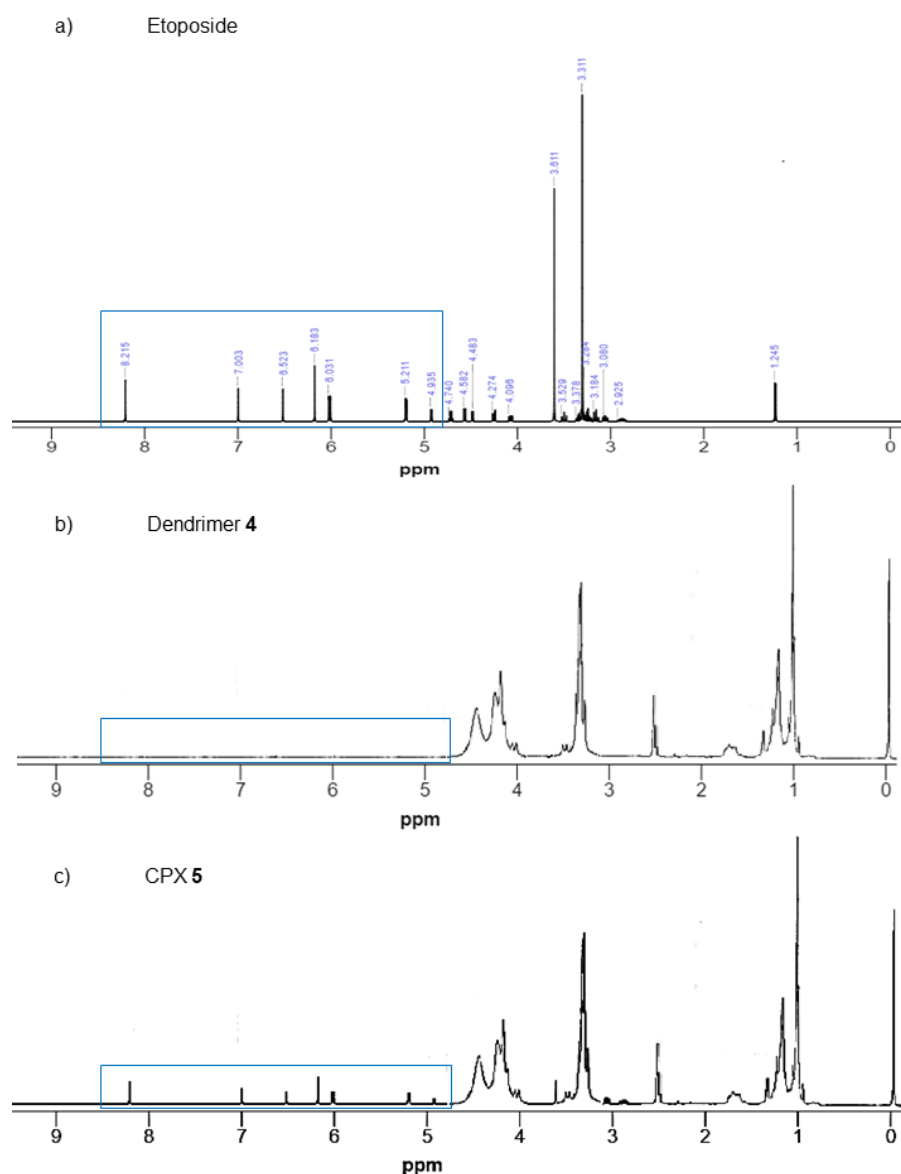

**Figure S6.**  $^1\text{H}$  NMR spectra (DMSO- $d_6$ ) of (a) ETO (400 MHz) [2], (b) dendrimer **4** (300MHz) and (c) CPX **5** (300 MHz).

## Section S5

### Principal Component Analysis results

PCA is a chemometric tool extensively used to process FTIR spectral data obtained from very numerous samples population to put in comparison. In PCA, multi-dimensional data are reduced to a small number of new variables – principal components (PCs) – which are orthogonal linear combinations of the original ones that efficiently represent data variability in low dimensions [3]. Information carried out by PCs is expressed in terms of percentage of explained variance. By definition, PC1 has the largest % explained variance, followed by PC2, PC3 and so on [4]. Briefly, PCA is able to put in evidence similarities or differences among the samples under study by clustering or separating them within a square of two Components identified for being Principal Components (PC).

Variance explained by 5 components: 100%. % Variance explained by each component: 92.71, 6.26, 1.03, 0.00, 0.00

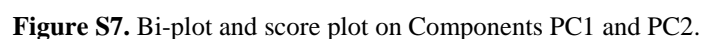

### UV Spectrophotometric Analysis results

| $C_{ETO}$<br>( $\mu\text{g/mL}$ ) | $A_{\text{average}} \pm SD$ | $C_{ETO\text{p}}$<br>( $\mu\text{g/mL}$ ) | Residuals | $C_{ETO}$<br>( $\mu\text{M}$ ) |
|-----------------------------------|-----------------------------|-------------------------------------------|-----------|--------------------------------|
| 5.0                               | $0.035 \pm 0.020$           | 4.8                                       | -0.2      | 8.49                           |
| 10.0                              | $0.079 \pm 0.013$           | 10.1                                      | +0.1      | 16.99                          |
| 20.0                              | $0.159 \pm 0.018$           | 19.9                                      | -0.1      | 33.98                          |
| 30.0                              | $0.242 \pm 0.024$           | 30.0                                      | 0         | 50.97                          |
| 40.0                              | $0.321 \pm 0.020$           | 39.6                                      | -0.4      | 67.96                          |

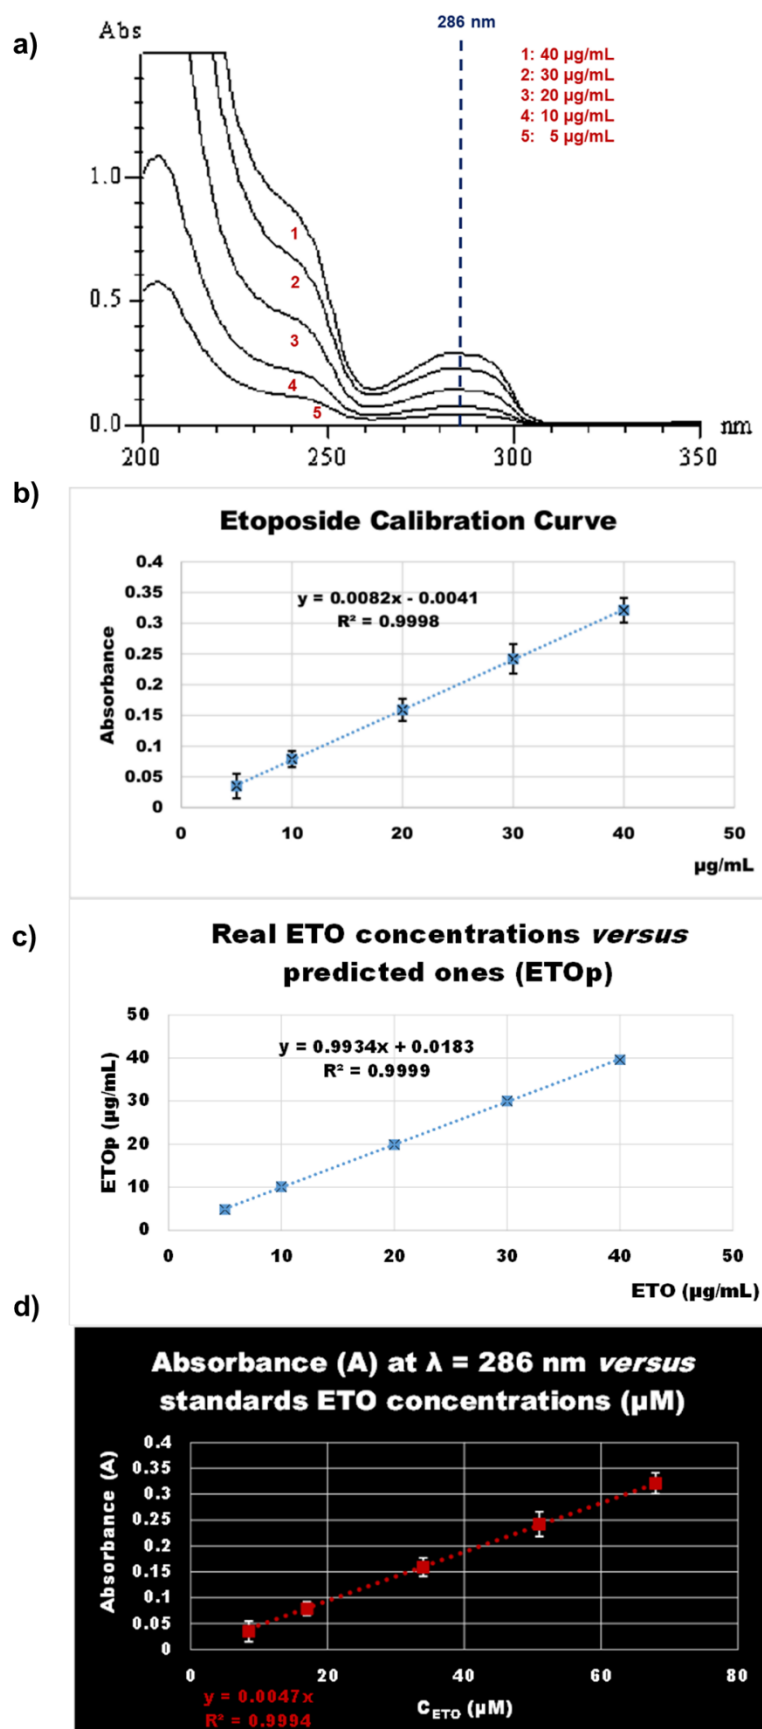

**Figure S8.** UV spectra of ETO dissolved in ACN/TDW 50:50 at the different concentrations used to build up the standard ETO calibration curve (a), standard ETO calibration curve (b), real ETO concentrations *versus* predicted ones (c), Absorbance (A) at  $\lambda = 286$  nm *versus* standards ETO concentrations ( $\mu$ M) (d).

## Section S7

### Dynamic Light Scattering Analysis

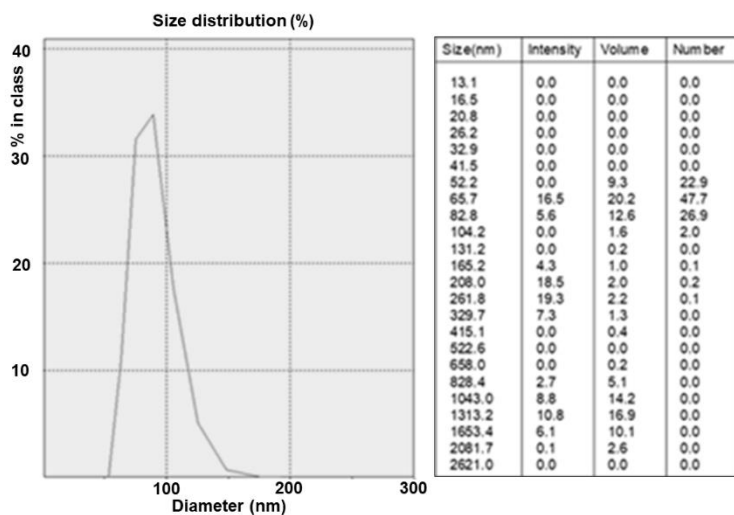

Figure S9. Dynamic Light Scattering Analysis of CPX 5

## References

- [1] Alfei, S.; Catena, S.; Turrini, F. Biodegradable and biocompatible spherical dendrimer nanoparticles with a gallic acid shell, as double-acting, high performant antioxidant device to fight diseases from "oxidative stress", *Drug Deliv. Transl. Res.* **2019**. <https://doi.org/10.1007/s13346-019-00681-8>.
- [2] Spectral Database for Organic Compounds (SDBS): [https://sdb.sdb.aist.go.jp/sdb/cgi-bin/direct\\_frame\\_top.cgi](https://sdb.sdb.aist.go.jp/sdb/cgi-bin/direct_frame_top.cgi) (latest access, 24 November 2019).
- [3] Jolliffe, I.T.; Cadima, J. Principal component analysis: a review and recent developments. *Philos. Trans. A Math. Phys. Eng. Sci.* **2016**, *374*, 20150202.
- [4] Alfei, S.; Oliveri, P.; Malegori, C. Assessment of the Efficiency of a Nanospherical Gallic Acid Dendrimer for Long-Term Preservation of Essential Oils: An Integrated Chemometric-Assisted FTIR Study. *ChemistrySelect* **2019**, *4*, 8891 -8901.
